# Supplementary material for: Colorimetric Determination of the Activity of Starch-Debranching Enzyme via Modified Tollens’ Reaction
Source: MDPI journal article supplement (doi:10.3390/nano9091291), 2019-09-10
Supplement: s1 [file s1]

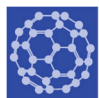

# Colorimetric determination of the activity of starch-debranching enzyme via modified Tollens' reaction

Ke Luo, Nack-geun Kim, Sang-Mook You, and Young-Rok Kim\*

Graduate School of Biotechnology & Department of Food Science and Biotechnology, College of Life Sciences, Kyung Hee University, Yongin, 17104 South Korea

\* Correspondence: Tel: +82-31-201-3830; E-mail address: youngkim@khu.ac.kr

Received: date; Accepted: date; Published: date

**Table S1.** The ratio of small and large glucan molecules in supernatant, precipitate, and whole debranched solution (DS).

| Samples            | Peak 1          |                           |                 | Peak 2        |                           |     | Peak 3        |                           |    |
|--------------------|-----------------|---------------------------|-----------------|---------------|---------------------------|-----|---------------|---------------------------|----|
|                    | Peak area (%)   | MW (g mol <sup>-1</sup> ) | DP <sup>a</sup> | Peak area (%) | MW (g mol <sup>-1</sup> ) | DP  | Peak area (%) | MW (g mol <sup>-1</sup> ) | DP |
| <b>DS</b>          | 26.74           | 82212                     | 457             | 35.31         | 29619                     | 165 | 37.95         | 2540                      | 14 |
| <b>Supernatant</b> | 43.22           | 83178                     | 462             | 47.37         | 28167                     | 157 | 9.41          | 2409                      | 13 |
| <b>Precipitate</b> | ND <sup>b</sup> | ND                        | ND              | ND            | ND                        | ND  | 99.2          | 2413                      | 13 |

<sup>a</sup> Degree of polymerization.

<sup>b</sup> Peak is not detected.

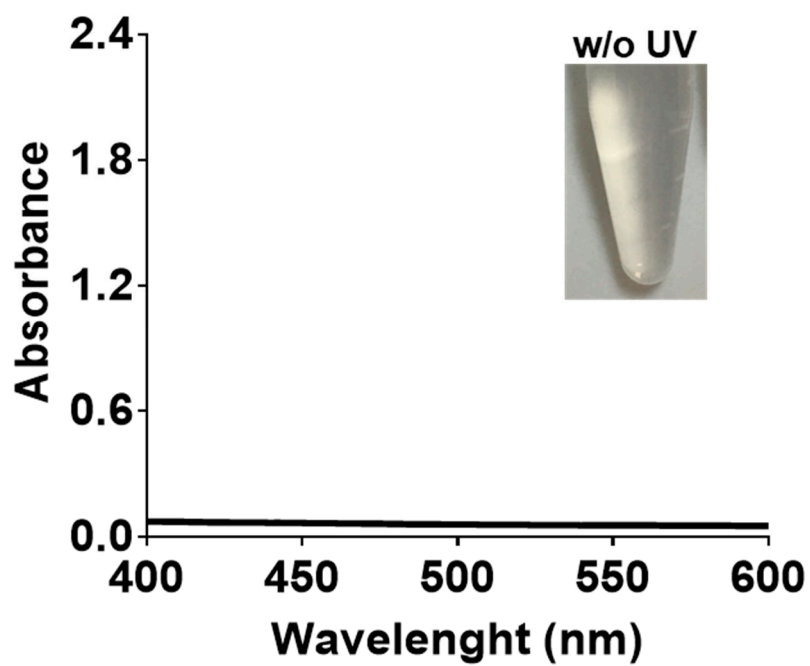

**Figure S1.** UV-vis absorption spectra of AgNPs formed without UV irradiation for 30 min.

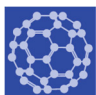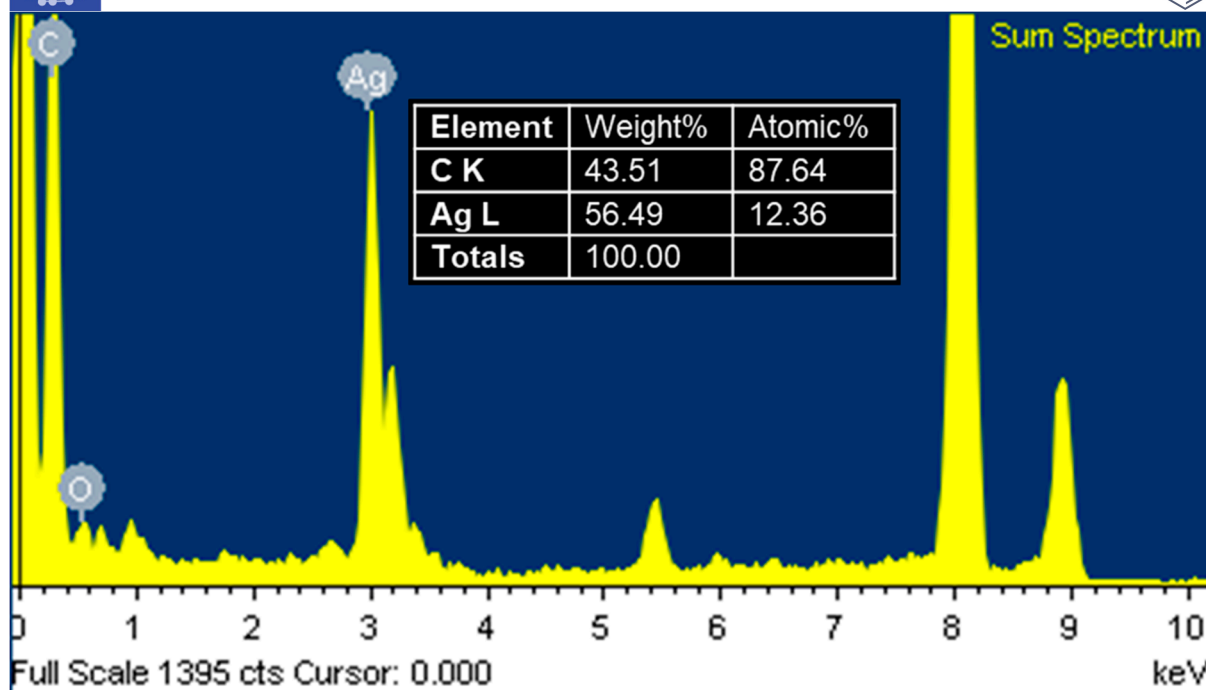

**Figure S2.** EDX spectra of DS-AgNPs formed with the debranched SCGs. Inset shows the weight and atomic percentages of carbon and silver in DS-AgNPs.

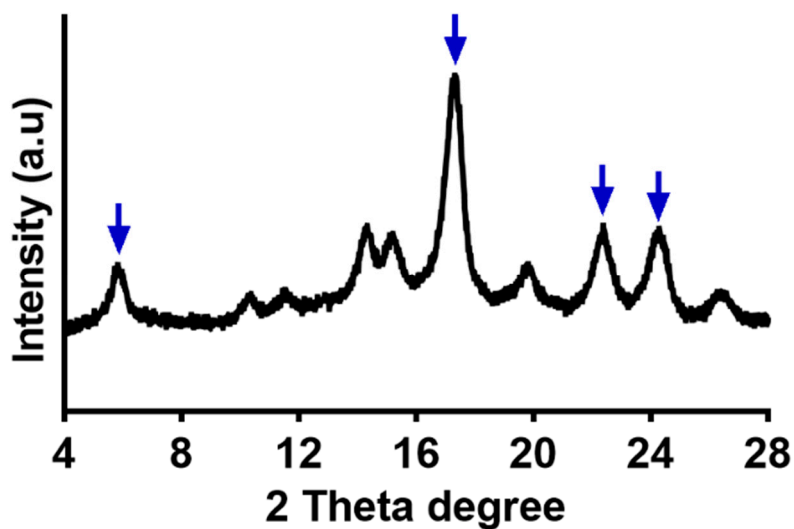

**Figure S3.** XRD analysis of white precipitate obtained by freezing the debranched starch solution at  $-20\text{ }^{\circ}\text{C}$  for 5 min. The blue arrows represent the characteristic peaks for B-type crystal. The crystal type of SCG precipitates were analyzed from  $4^{\circ}$  to  $28^{\circ}$  ( $2\theta$ ) using  $\text{Cu-K}\alpha$  radiation on a Bruker D8 Advance X-ray diffractometer (Bruker, Karlsruhe, Germany). All samples were fully dehydrated in a vacuum desiccator before XRD analysis.

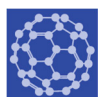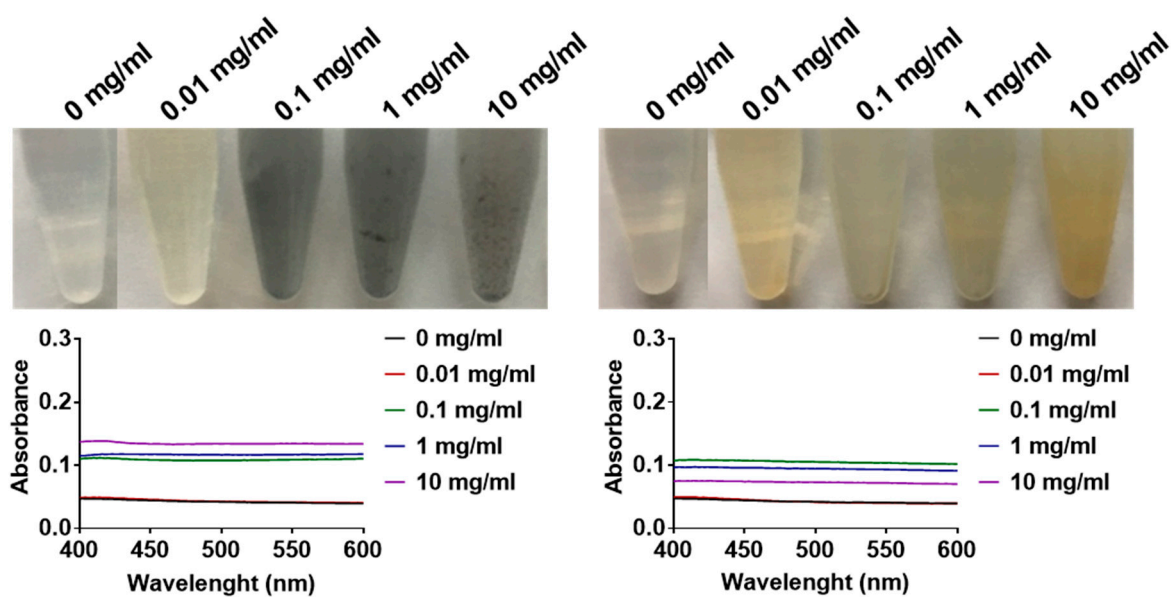

**Figure S4.** Photographic images of reaction tubes (up) and UV-vis absorption spectra (down) of AgNPs formed with varying concentration of glucose (left) and fructose (right) through the modified Tollens' reaction under UV irradiation for 5 min.

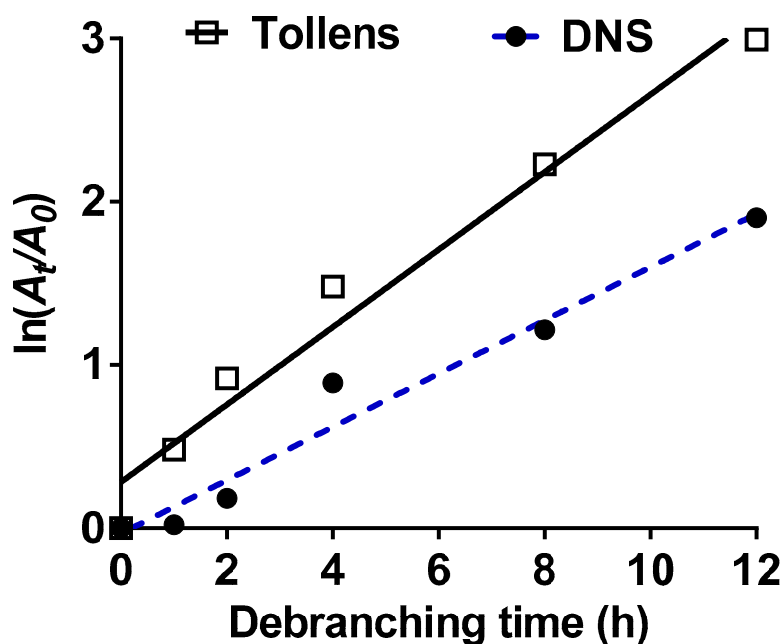

**Figure S5.** The plot of  $\ln(A_0/A_t)$  from modified Tollens reaction (hollow square) and DNS assay (filled circle) versus debranching time.

The debranching rate constant of pullulanase was calculated by using a first-order kinetic model [1]:

$$\ln(A_t/A_0) = kt \quad (1)$$

where  $A_0$  donates the initial absorption at 426 nm and 540 nm in the Tollens' reaction and DNS assay, respectively, and  $A_t$  is the absorption at a given time point,  $t$ , and  $k$  is the reaction rate constant.

## References

1. Simonin, J.-P. On the comparison of pseudo-first order and pseudo-second order rate laws in the modeling of adsorption kinetics. *Chem. Eng. J.* **2016**, *300*, 254-263.
